# Supplementary material for: Levofloxacin and Ciprofloxacin Co-Crystals with Flavonoids: Solid-State Investigation for a Multitarget Strategy against Helicobacter pylori
Source: MDPI journal article supplement (doi:10.3390/pharmaceutics16020203), 2024-01-30
Supplement: s1 [file s1]

Supporting information (10 pages)

**Levofloxacin and Ciprofloxacin Co-Crystals with Flavonoids:  
Solid-State Investigation for a Multitarget Strategy  
against *Helicobacter pylori***

Cecilia Fiore <sup>1,2,\*</sup>, Federico Antoniciello <sup>3,\*</sup>, Davide Roncarati <sup>3</sup>, Vincenzo Scarlato <sup>3</sup>, Fabrizia Grepioni <sup>1</sup>  
and Dario Braga <sup>1</sup>

<sup>1</sup> Department of Chemistry "Giacomo Ciamician", University of Bologna, Via Selmi 2, 40126 Bologna, Italy; fabrizia.grepioni@unibo.it (F.G.); dario.braga@unibo.it (D.B.)

<sup>2</sup> Department of Applied Science and Technology (DISAT), Politecnico di Torino, Corso Duca degli Abruzzi 24, 10129 Torino, Italy

<sup>3</sup> Department of Pharmacy and Biotechnology (FaBiT), University of Bologna, Via Selmi 3, 40126 Bologna, Italy; davide.roncarati@unibo.it (D.R.); vincenzo.scarlato@unibo.it (V.S.)

\* Correspondence: cecilia.fiore@polito.it (C.F.); federic.antoniciell2@unibo.it (F.A.);  
Tel.: +39-051-2094207 (F.A.)

**Powder X-ray Diffraction (PXRD) .....page 2**

**Thermogravimetric analysis (TGA) .....page 4**

**<sup>1</sup>H NMR spectroscopy .....page 5**

## Powder X-ray Diffraction (PXRD)

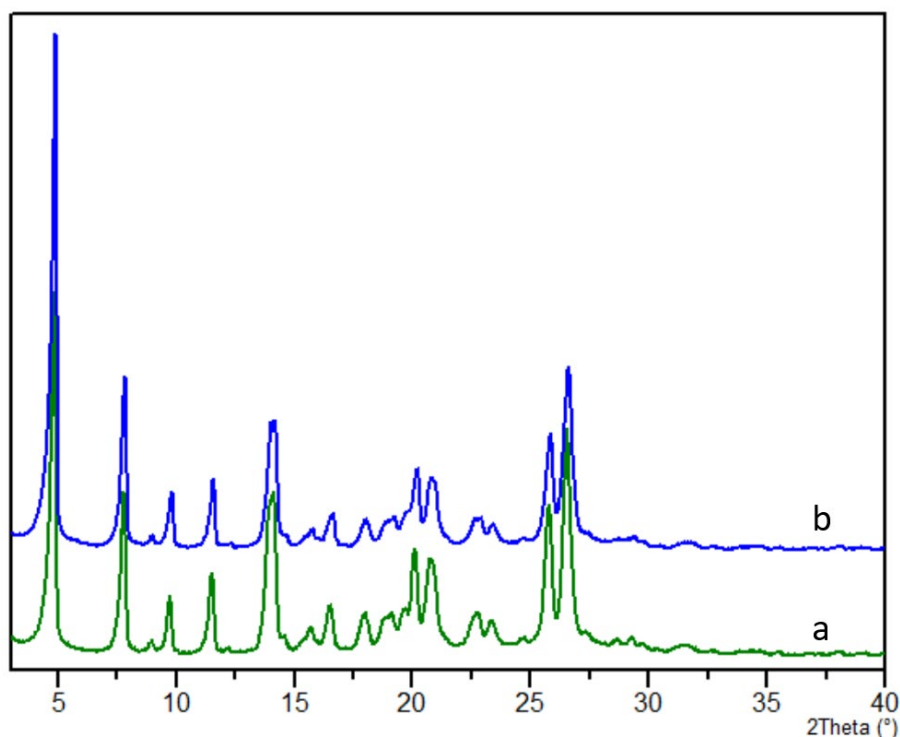

**Figure S1** Comparison of the experimental PXRD patterns for LEV·QUE·xEtOH as obtained from ball milling (a, green) and slurry (b, blue).

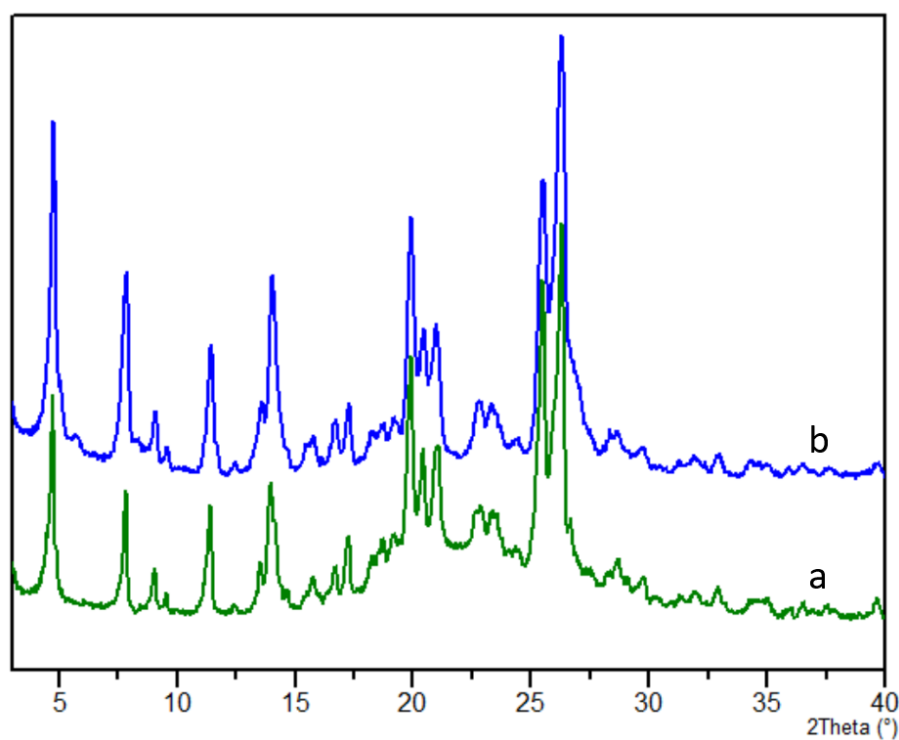

**Figure S2** Comparison of the experimental PXRD patterns for LEV·MYR·xEtOH as obtained from ball milling (a, green) and slurry (b, blue).

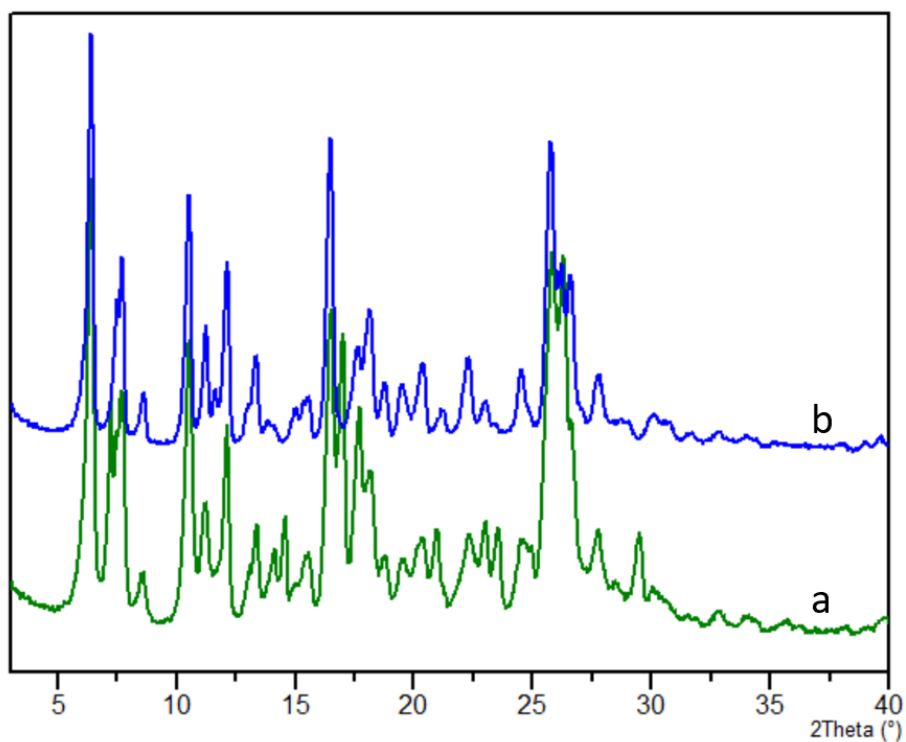

**Figure S3** Comparison of the experimental PXRD patterns for LEV<sub>2</sub>·HES as obtained from ball milling (a, green) and slurry (b, blue). (The ball milling product still contains unreacted substance).

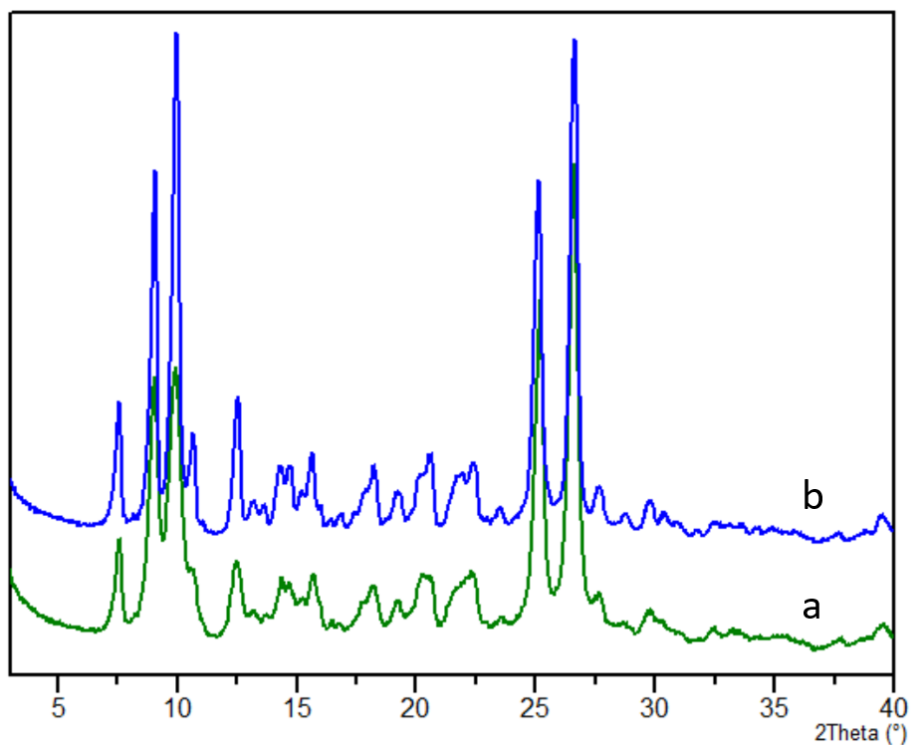

**Figure S4** Comparison of the experimental PXRD patterns for CIP·QUE as obtained from ball milling (a, green) and slurry (b, blue).

# Thermogravimetric Analysis (TGA)

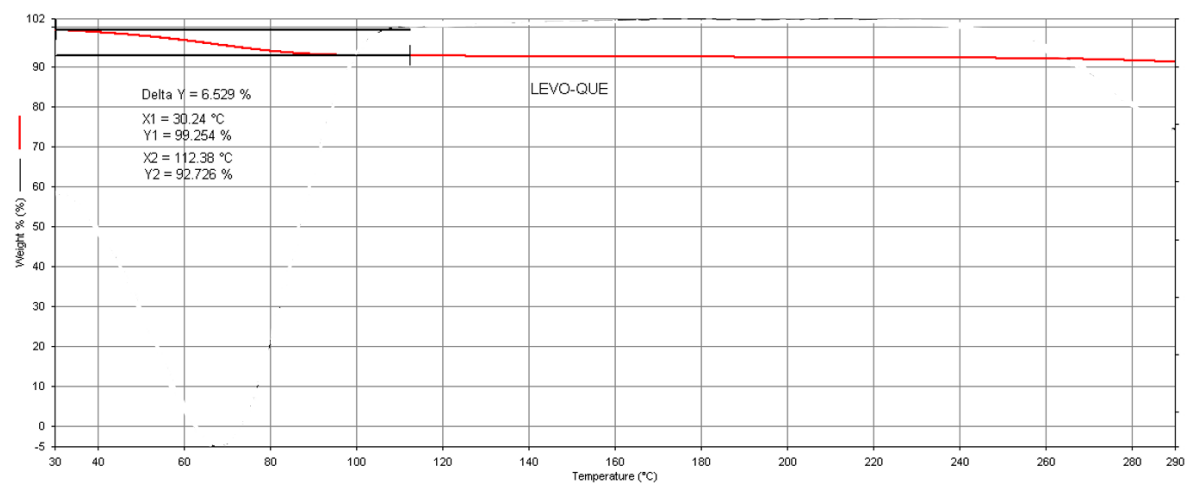

Figure S5. TGA trace for LEV·QUE·xEtOH.

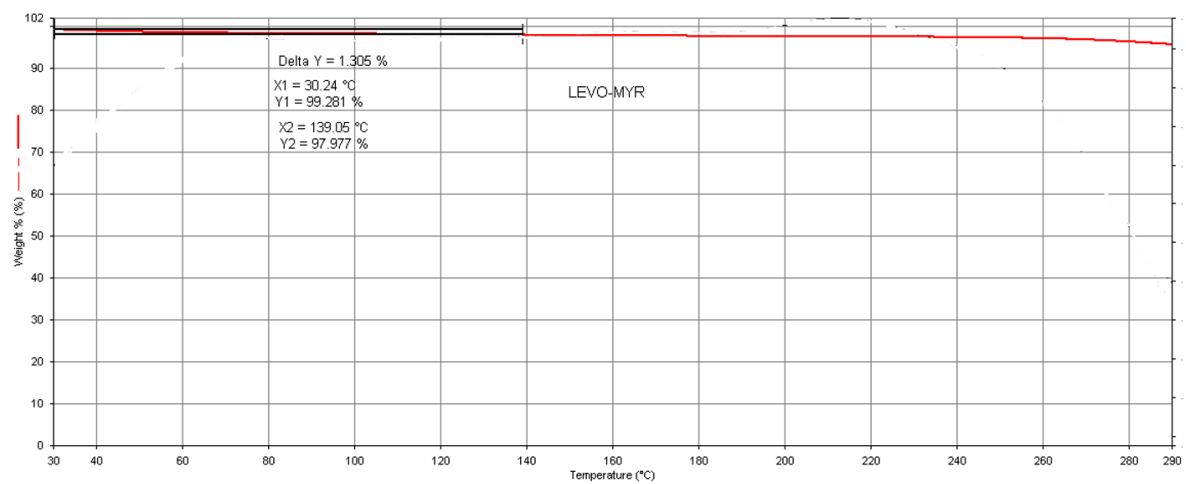

Figure S6. TGA trace for LEV·MYR·xEtOH.

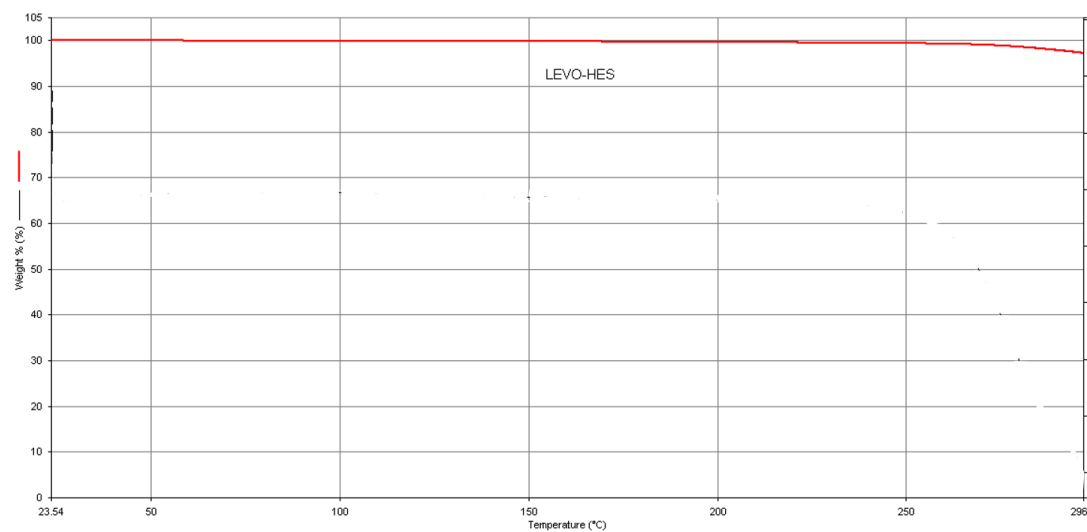

Figure S7. TGA trace for LEV<sub>2</sub>·HES

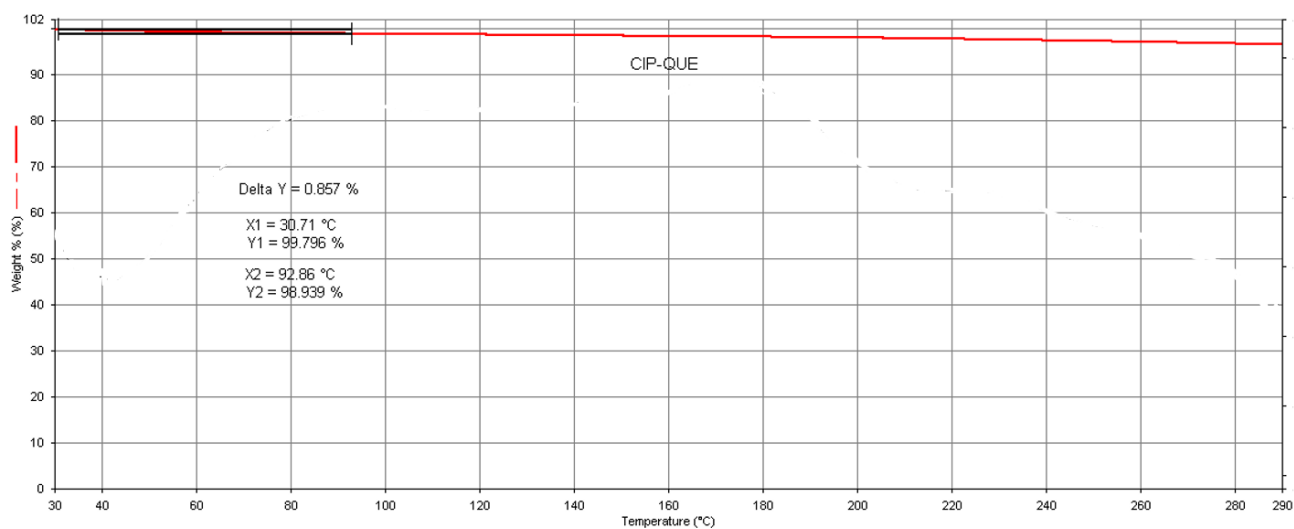

**Figure S8.** TGA trace for CIP·QUE.

## <sup>1</sup>H NMR spectroscopy

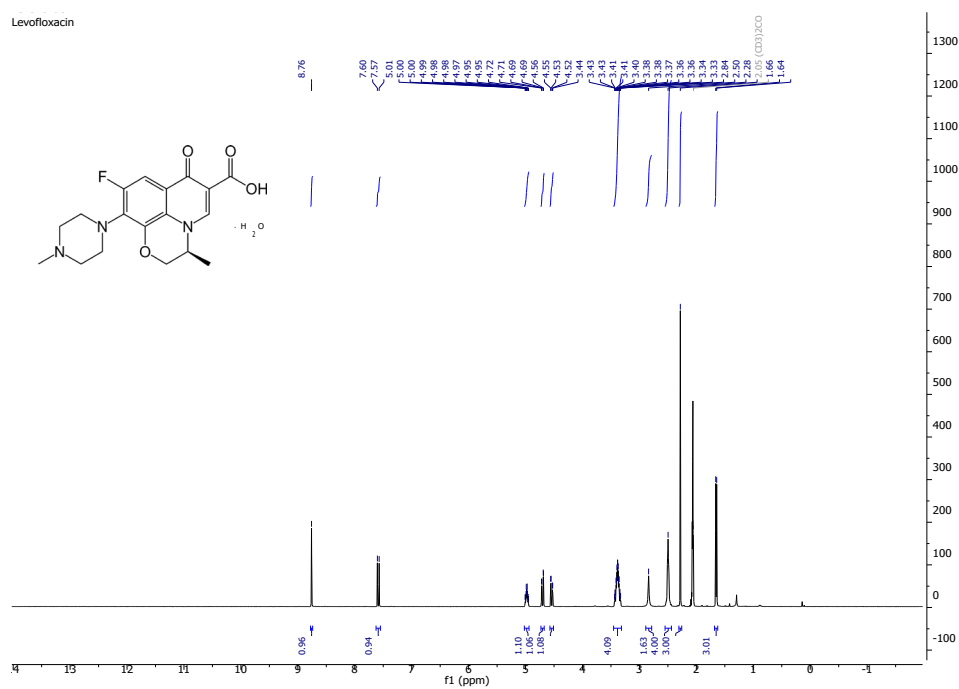

**Figure S9. Levofloxacin:** <sup>1</sup>H NMR (401 MHz, Acetone-*d*<sub>6</sub>) δ 8.76 (s, 1H), 7.59 (d, *J* = 12.4 Hz, 1H), 5.02 – 4.94 (m, 1H), 4.70 (dd, *J* = 11.5, 1.8 Hz, 1H), 4.54 (dd, *J* = 11.5, 2.3 Hz, 1H), 3.39 (m, 4H), 2.50 (s, 4H), 2.28 (s, 3H), 1.65 (d, *J* = 6.8 Hz, 3H). **H<sub>2</sub>O:** 2.84 (s, 2H).

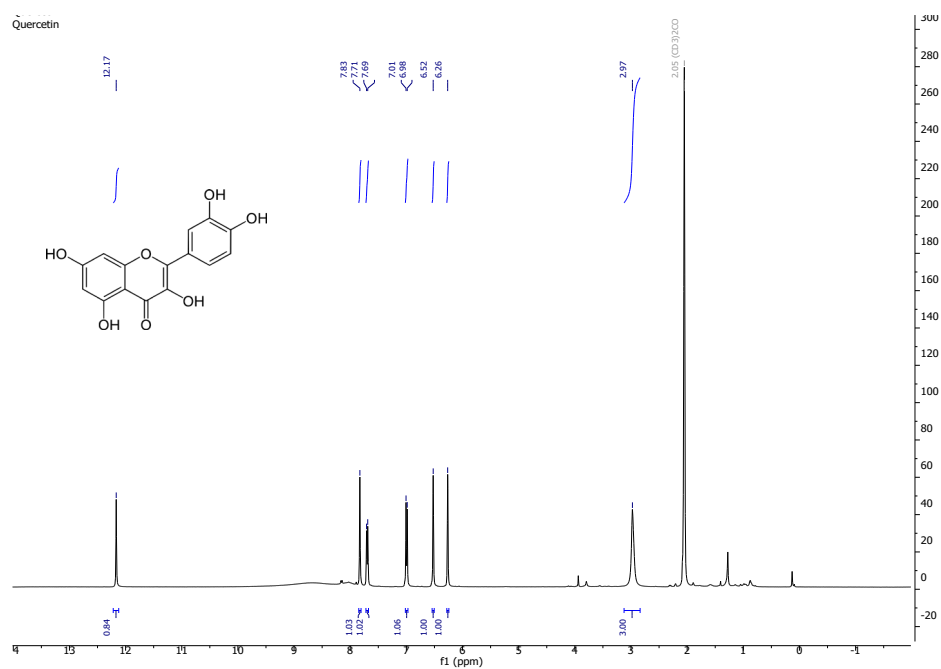

**Figure S10. Quercetin:**  $^1\text{H}$  NMR (401 MHz, Acetone- $d_6$ )  $\delta$  12.17 (s, 1H), 7.83 (s, 1H), 7.70 (d,  $J = 8.4$  Hz, 1H), 7.00 (d,  $J = 8.5$  Hz, 1H), 6.52 (s, 1H), 6.26 (s, 1H), 2.97 (s, 3H).

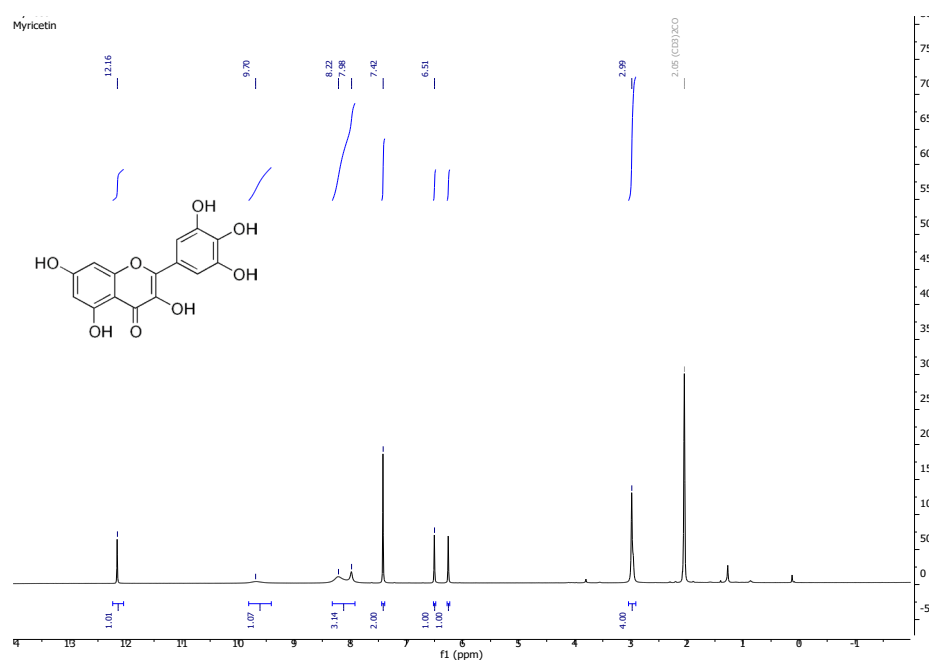

**Figure S11. Myricetin:**  $^1\text{H}$  NMR (401 MHz, Acetone- $d_6$ )  $\delta$  12.16 (s, 1H), 9.70 (s, 1H), 8.10 (d,  $J = 93.4$  Hz, 3H), 7.42 (s, 2H), 6.51 (s, 1H), 6.26 (d,  $J = 2.1$  Hz, 1H), 2.99 (s, 4H – MYRICETIN +  $\text{H}_2\text{O}/\text{SOLVENT}$ ).

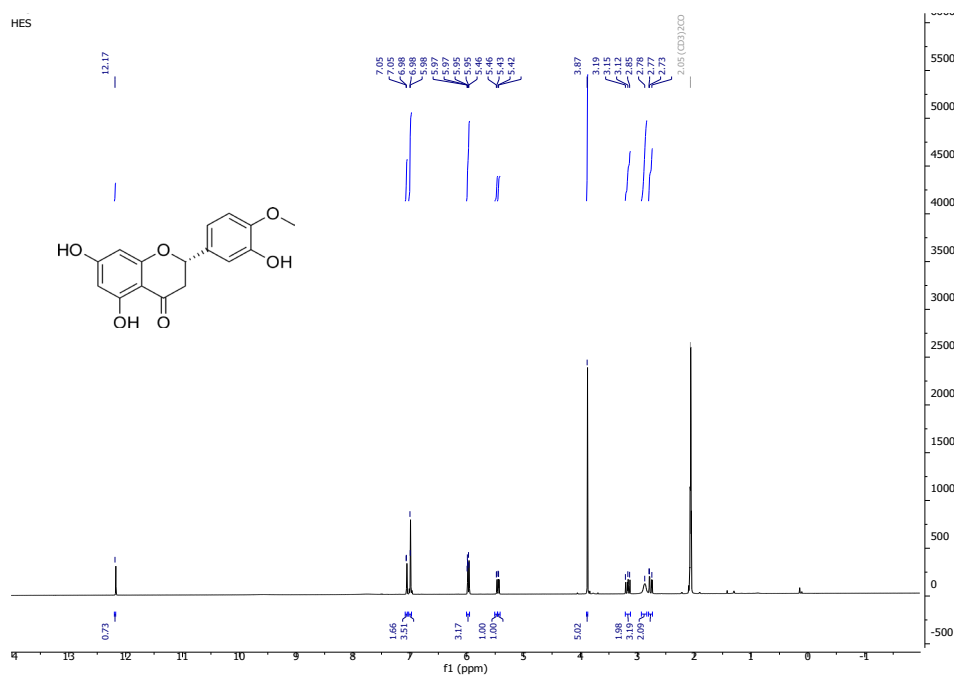

**Figure S12. Hesperetin:**  $^1\text{H}$  NMR (401 MHz, Acetone- $d_6$ )  $\delta$  12.17 (s, 1H), 7.05 (d,  $J$  = 1.4 Hz, 2H), 6.98 (d,  $J$  = 2.0 Hz, 4H), 5.99 – 5.94 (m, 3H), 5.46 (d,  $J$  = 3.1 Hz, 1H), 5.43 (d,  $J$  = 3.1 Hz, 1H). -O-CH $_3$  + solvent impurity :3.87 (s, 5H), SOLVENTS RESIDUES 3.20 – 3.11 (m, 2H), 2.85 (s, 3H), 2.79 – 2.72 (m, 2H).

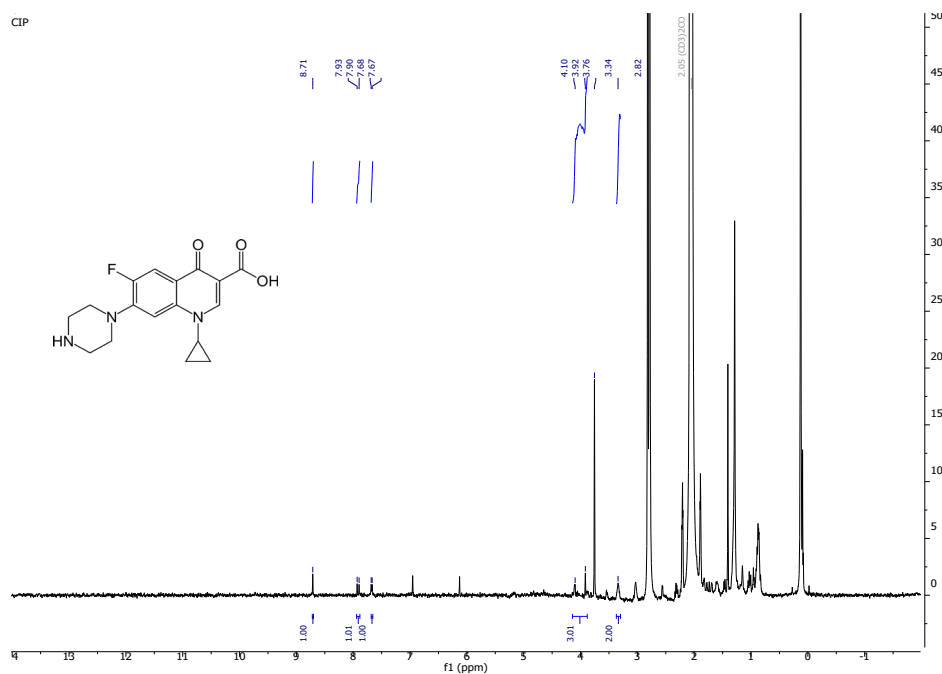

**Figure S13. Ciprofloxacin:** analysis of the spectrum incomplete due to the low quality of signals belonging to CIP and too the presence of impurities covering the signals of interest.  $^1\text{H}$  NMR (401 MHz, Acetone- $d_6$ )  $\delta$  8.71 (s, 1H), 7.91 (d,  $J$  = 13.6 Hz, 1H), 7.68 (d,  $J$  = 7.0 Hz, 1H), 4.01 (d,  $J$  = 72.0 Hz, 3H), 3.34 (s, 2H).

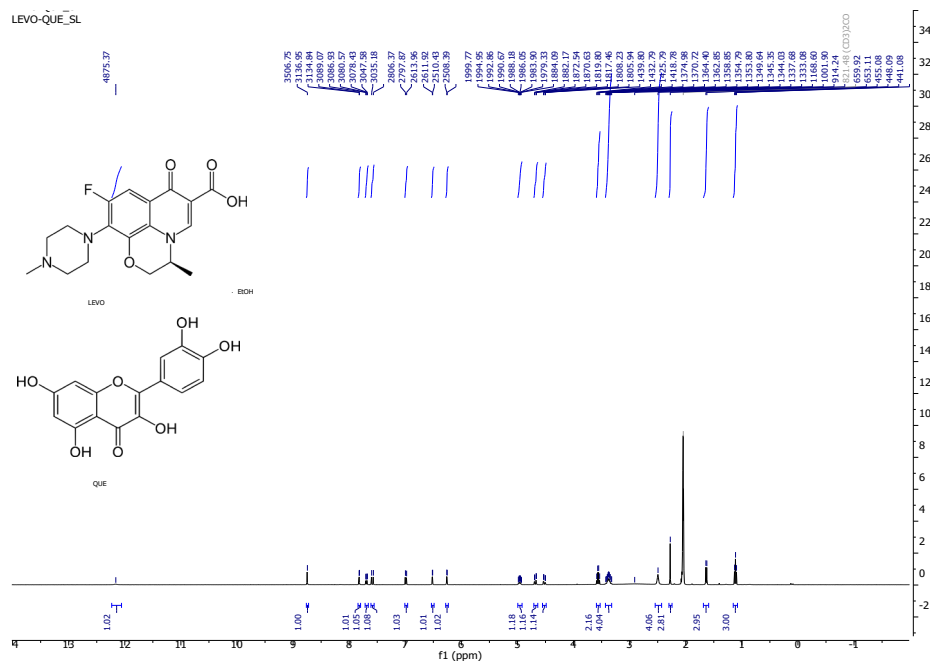

**Figure S14. LEV·QUE·xEtOH:** <sup>1</sup>H NMR (401 MHz, Acetone-*d*<sub>6</sub>) δ 12.17 (s, 1H), 8.75 (s, 1H), 7.83 (d, *J* = 2.1 Hz, 1H), 7.70 (dd, *J* = 8.5, 2.1 Hz, 1H), 7.59 (d, *J* = 12.4 Hz, 1H), 6.99 (d, *J* = 8.5 Hz, 1H), 6.52 (d, *J* = 2.0 Hz, 1H), 6.26 (d, *J* = 2.0 Hz, 1H), 4.96 (m, 1H), 4.68 (dd, *J* = 11.5, 1.9 Hz, 1H), 4.52 (dd, *J* = 11.5, 2.3 Hz, 1H), 3.57 (q, *J* = 7.0 Hz, 2H), 3.44 – 3.33 (m, 4H), 2.50 (s, 4H), 2.28 (s, 3H), 1.64 (d, *J* = 6.8 Hz, 3H), **EtOH -CH<sub>2</sub>**: 3.57 (q, *J* = 7.0 Hz, 2H), **-CH<sub>3</sub>**: 1.12 (t, *J* = 7.0 Hz, 3H).

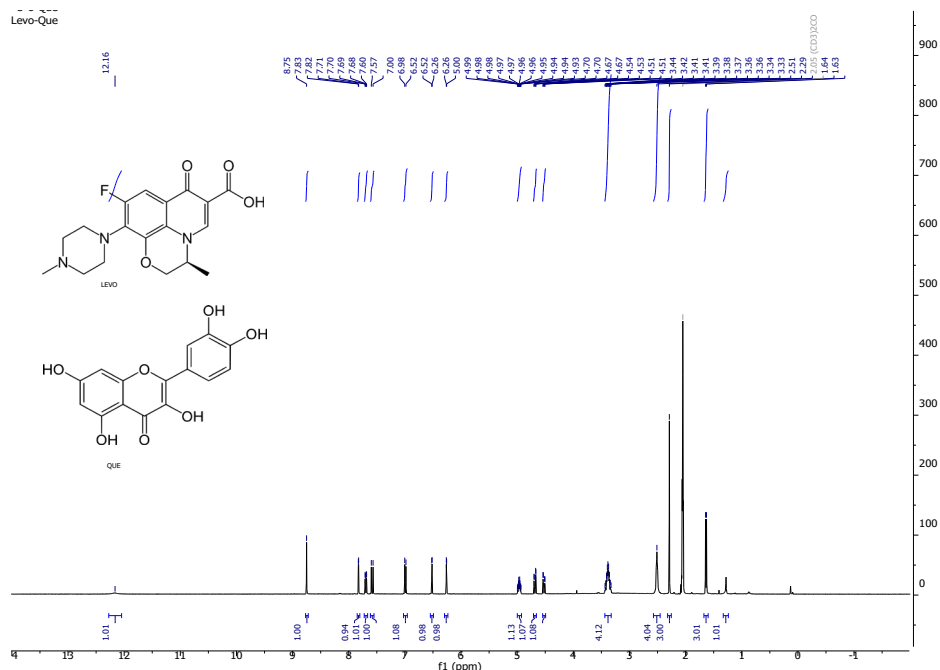

**Figure S15. LEV·QUE:** <sup>1</sup>H NMR (401 MHz, Acetone-*d*<sub>6</sub>) δ 12.16 (s, 1H), 8.75 (s, 1H), 7.83 (d, *J* = 2.1 Hz, 1H), 7.70 (dd, *J* = 8.5, 2.1 Hz, 1H), 7.58 (d, *J* = 12.4 Hz, 1H), 6.99 (d, *J* = 8.5 Hz, 1H), 6.52 (d, *J* = 1.9 Hz, 1H), 6.26 (d, *J* = 2.0 Hz, 1H), 4.96 (m, 1H), 4.68 (dd, *J* = 11.5, 1.8 Hz, 1H), 4.52 (dd, *J* = 11.5, 2.3 Hz, 1H), 3.44 – 3.33 (m, 4H), 2.51 (s, 4H), 2.29 (s, 3H), 1.64 (d, *J* = 6.8 Hz, 3H), 1.28 (s, 1H).



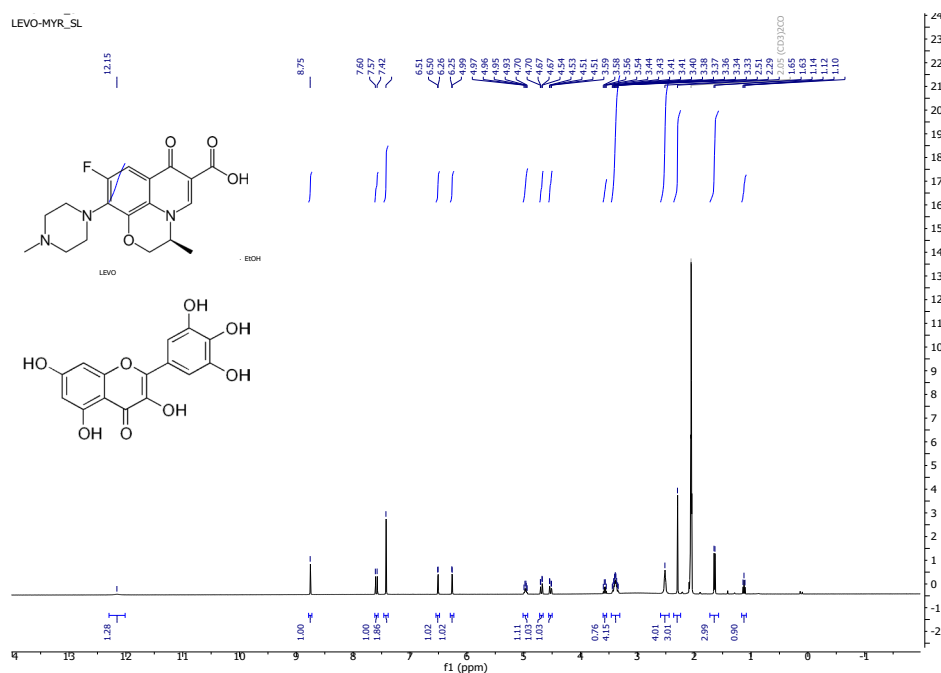

**Figure S16. LEV·MYR·xEtOH:**  $^1\text{H}$  NMR (401 MHz, Acetone- $d_6$ )  $\delta$  12.15 (s, 1H), 8.75 (s, 1H), 7.59 (d,  $J$  = 12.4 Hz, 1H), 7.42 (s, 2H), 6.50 (d,  $J$  = 2.0 Hz, 1H), 6.26 (d,  $J$  = 2.0 Hz, 1H), 5.01 – 4.92 (m, 1H), 4.68 (dd,  $J$  = 11.5, 1.9 Hz, 1H), 4.52 (dd,  $J$  = 11.5, 2.3 Hz, 1H), 3.38 (m, 4H), 2.51 (s, 4H), 2.29 (s, 3H), 1.64 (d,  $J$  = 6.8 Hz, 3H). EtOH -CH<sub>2</sub>: 3.57 (q,  $J$  = 7.0 Hz, 0.76H), -CH<sub>3</sub>: 1.12 (t,  $J$  = 7.0 Hz, 0.90H).

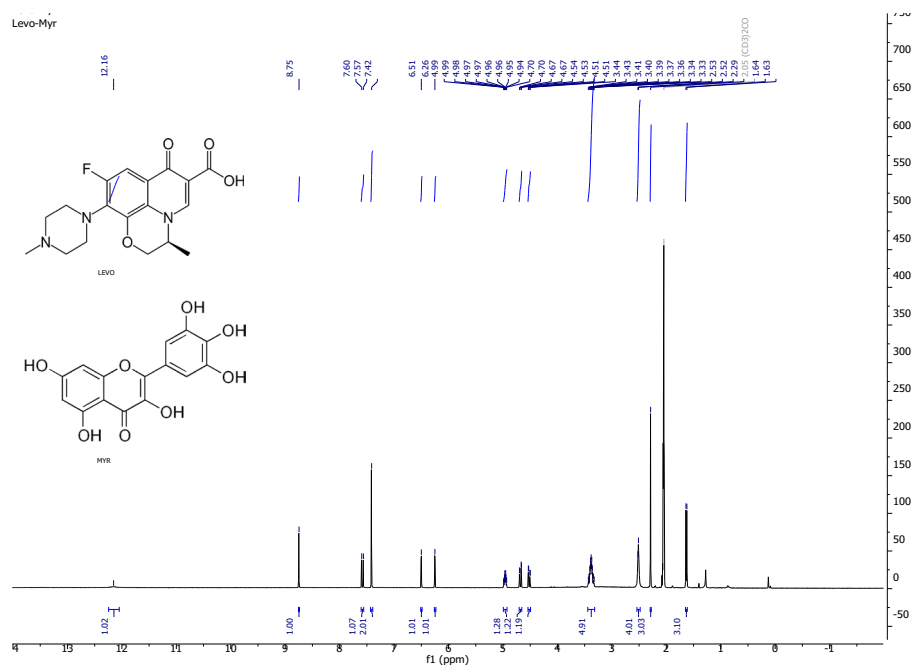

**Figure S17. LEV·MYR:**  $^1\text{H}$  NMR (401 MHz, Acetone- $d_6$ )  $\delta$  12.16 (s, 1H), 8.75 (s, 1H), 7.58 (d,  $J$  = 12.4 Hz, 1H), 7.42 (s, 2H), 6.51 (s, 1H), 6.26 (s, 1H), 5.00 – 4.93 (m, 1H), 4.68 (dd,  $J$  = 11.5, 1.8 Hz, 1H), 4.52 (dd,  $J$  = 11.6, 2.3 Hz, 1H), 3.45 – 3.32 (m, 5H), 2.55 – 2.49 (m, 4H), 2.29 (s, 3H), 1.64 (d,  $J$  = 6.8 Hz, 3H).

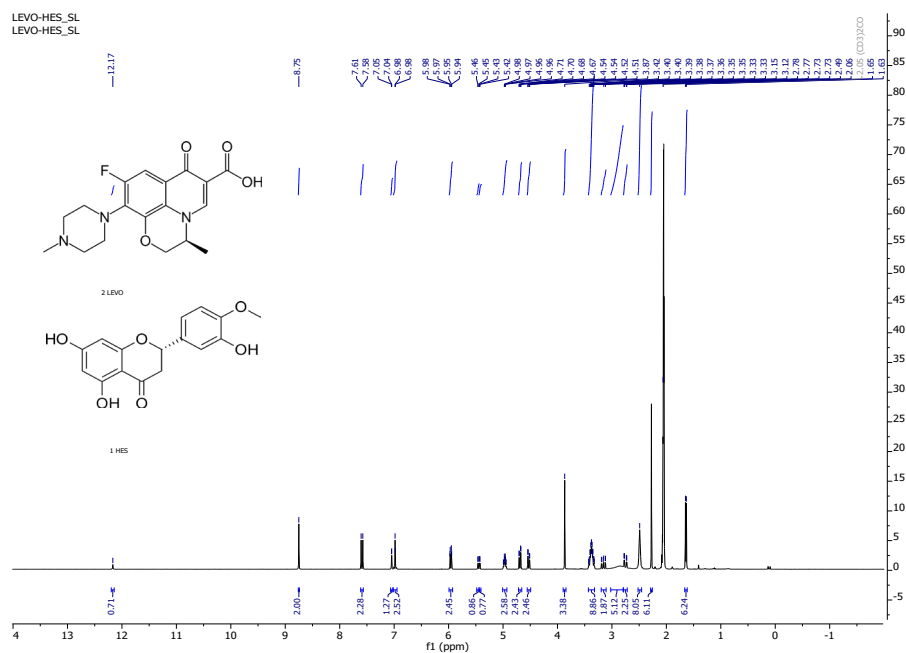

**Figure S18. LEV<sub>2</sub>·HES:** <sup>1</sup>H NMR (401 MHz, Acetone-*d*<sub>6</sub>) δ 12.17 (s, 1H), 8.75 (s, 2H), 7.59 (d, *J* = 12.4 Hz, 2H), 7.05 (d, *J* = 1.3 Hz, 1.5H), 6.98 (d, *J* = 2.1 Hz, 3H), 5.96 (dd, *J* = 10.5, 2.1 Hz, 2H), 5.46 (d, *J* = 3.0 Hz, 1H), 5.43 (d, *J* = 3.0 Hz, 1H), 4.97 (m, 3H), 4.69 (dd, *J* = 11.5, 1.9 Hz, 2H), 4.53 (dd, *J* = 11.5, 2.3 Hz, 2H), 3.87 (s, 3H), 3.38 (th, *J* = 12.1, 4.3 Hz, 8H), 3.16 (dd, *J* = 17.1, 12.6 Hz, 2H), 2.85 (s, 5H), 2.75 (dd, *J* = 17.1, 3.1 Hz, 2H), 2.49 (s, 8H), 2.27 (s, 6H), 1.64 (d, *J* = 6.8 Hz, 6H).

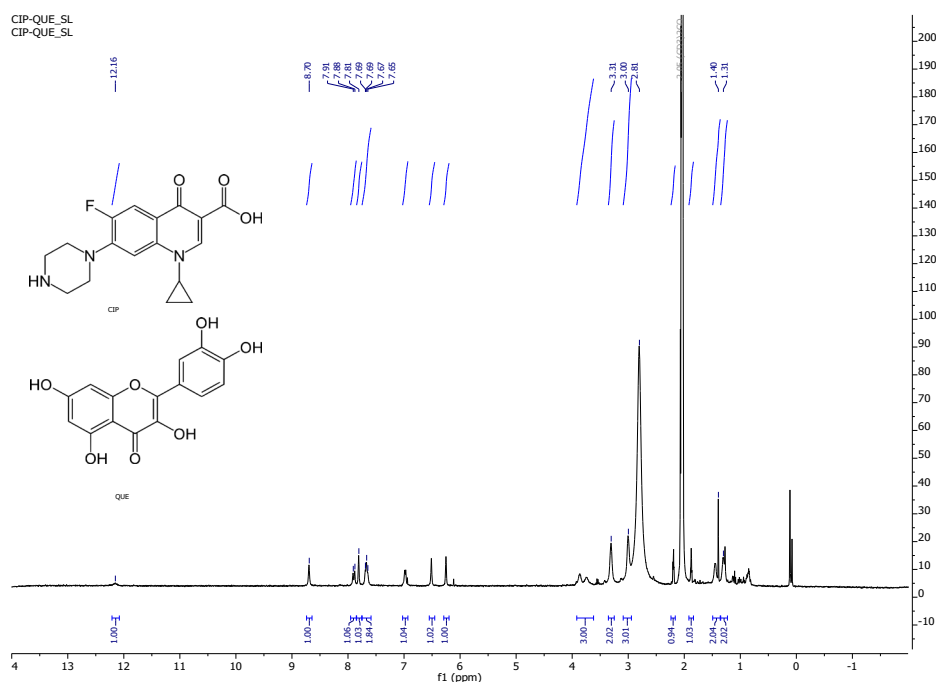

**Figure S19. CIP·QUE:** <sup>1</sup>H NMR (401 MHz, Acetone-*d*<sub>6</sub>) δ 12.16 (s, 1H), 8.70 (s, 1H), 7.90 (d, *J* = 11.6 Hz, 1H), 7.81 (s, 1H), 7.76 – 7.59 (m, 2H), 7.03 – 6.94 (m, 1H), 6.52 (s, 1H), 6.25 (s, 1H), 3.81 (d, *J* = 49.0 Hz, 3H), 3.31 (s, 2H), 3.00 (s, 3H), 2.20 (dd, *J* = 4.5, 2.3 Hz, 1H), 1.88 (p, *J* = 2.2 Hz, 1H), 1.40 (s, 2H), 1.31 (s, 2H).
